# Supplementary material for: Genome wide comparative analysis of the effects of PRMT5 and PRMT4/CARM1 arginine methyltransferases on the Arabidopsis thaliana transcriptome
Source: PubMed Central journal article supplement (PMC4381356; doi:10.1186/s12864-015-1399-2), 2015-03-17
Supplement: 12864_2015_1399_MOESM2_ESM.pdf [file 12864_2015_1399_MOESM2_ESM.pdf]

Total AS Events in WT  
(5362)

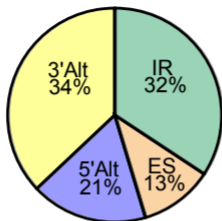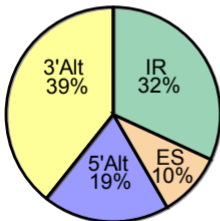

AS Events Affected  
in *prmt5*  
(1137)

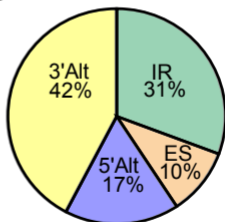

AS Events Affected  
in *prmt4a;4b*  
(1290)
